# Supplementary figures and images for: How do fluorescence spectroscopy and multimodal fluorescence imaging help to dissect the enhanced efficiency of the vancomycin–rifampin combination against Staphylococcus aureus infections?
Source: Royal Society of Chemistry journal article supplement (doi:10.1039/c7pp00079k), 2017-06-12

**Fig. S1 Chemical structures of vancomycin, rifampin and BODIPY-FL-vancomycin**

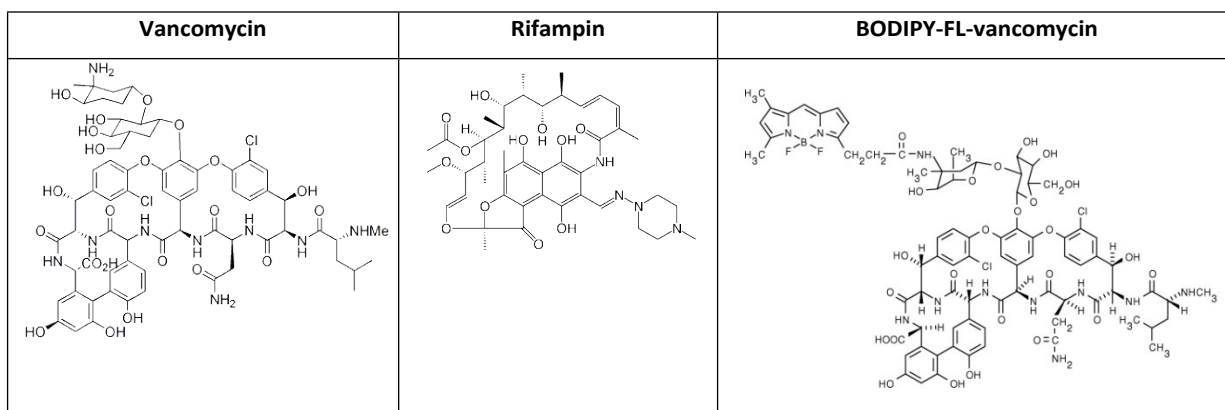

Supplement: c7pp00079k1.pdf [file c7pp00079k1.pdf]
